# Supplementary material for: Flexible supercapacitor with a record high areal specific capacitance based on a tuned porous fabric
Source: Royal Society of Chemistry journal article supplement (doi:10.1039/c6ta04911g), 2016-01-01
Supplement: c6ta04911g1.pdf [file c6ta04911g1.pdf]

## Supporting Information

**Table S1.** The mass loadings and the corresponding areal specific capacitances of conducting polymers and MnO<sub>2</sub> within supercapacitors using porous frameworks.

| Active material  | Mass loading<br>(mg cm <sup>-2</sup> ) | Areal specific capacitance<br>(mF cm <sup>-2</sup> ) | Reference |
|------------------|----------------------------------------|------------------------------------------------------|-----------|
| PPy              | 1.5                                    | 504                                                  | [1]       |
|                  | 6                                      | 1404                                                 | [1]       |
|                  | 7.26                                   | 1089                                                 | [2]       |
|                  | 3.54                                   | 420                                                  | [3]       |
|                  | 1.02                                   | 387.6                                                | [4]       |
|                  | 0.14                                   | 35.7                                                 | [5]       |
|                  | 5.27                                   | 1214                                                 | [6]       |
| PANI             | 1.67                                   | 1800                                                 | [7]       |
|                  | 0.45                                   | 184.5                                                | [8]       |
|                  | 5.2                                    | 3500                                                 | [9]       |
|                  | 4.7                                    | 2070                                                 | [10]      |
|                  | 1.4                                    | 800                                                  | [11]      |
|                  | 0.31                                   | 317                                                  | [12]      |
|                  | 0.3                                    | 132                                                  | [13]      |
|                  | 1                                      | 751.3                                                | [14]      |
|                  | 4.75                                   | 2245                                                 | [14]      |
| 6.28             | 2300                                   | [15]                                                 |           |
| PEDOT            | 4.34                                   | 325.5                                                | [16]      |
|                  | 0.55                                   | 85                                                   | [17]      |
| MnO <sub>2</sub> | 0.54                                   | 230                                                  | [18]      |
|                  | 1.3                                    | 400                                                  | [19]      |
|                  | 8.3                                    | 2800                                                 | [20]      |
|                  | 0.562                                  | 109                                                  | [21]      |
|                  | 0.31                                   | 193.75                                               | [22]      |

PPy: polypyrrole; PANI: polyaniline; PEDOT: poly (3,4-ethylenedioxythiophene);  
MnO<sub>2</sub>: manganese oxide.

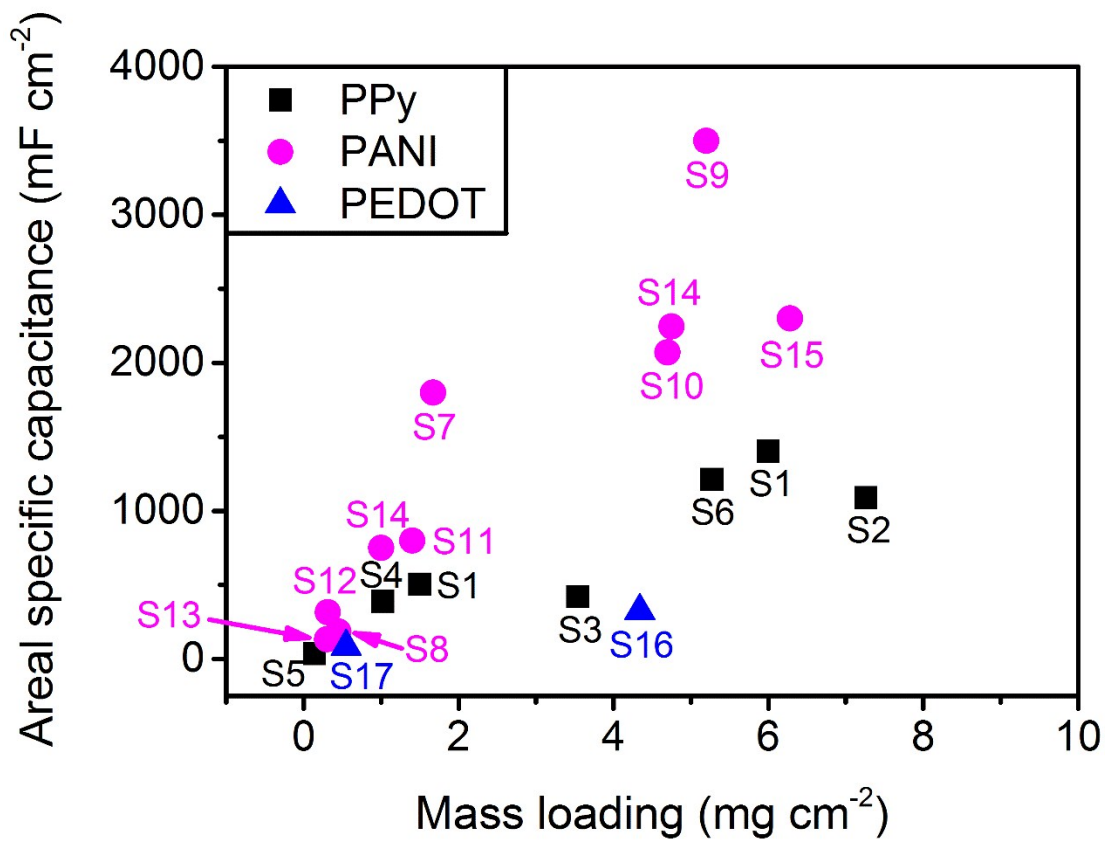

**Figure S1.** The mass loadings and the corresponding areal specific capacitances of conducting polymers within supercapacitors using porous frameworks (data extracted from Table S1).

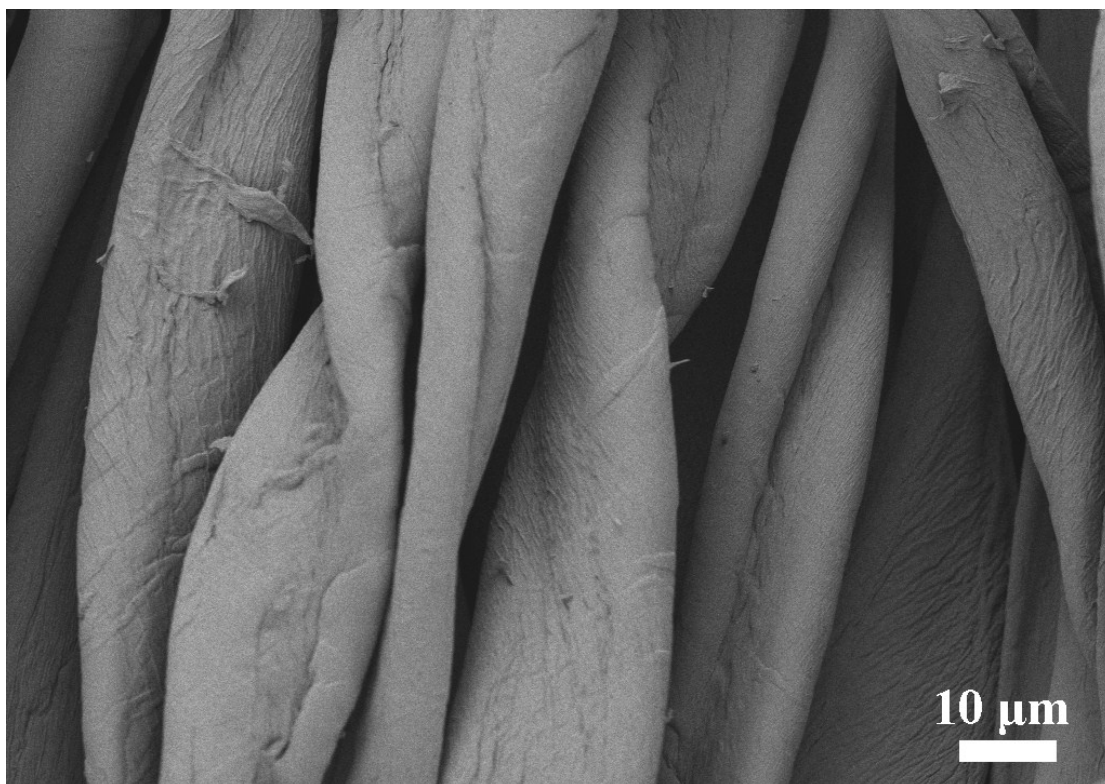

**Figure S2.** Cellulose fibers with an irregular section used to construct fabrics.

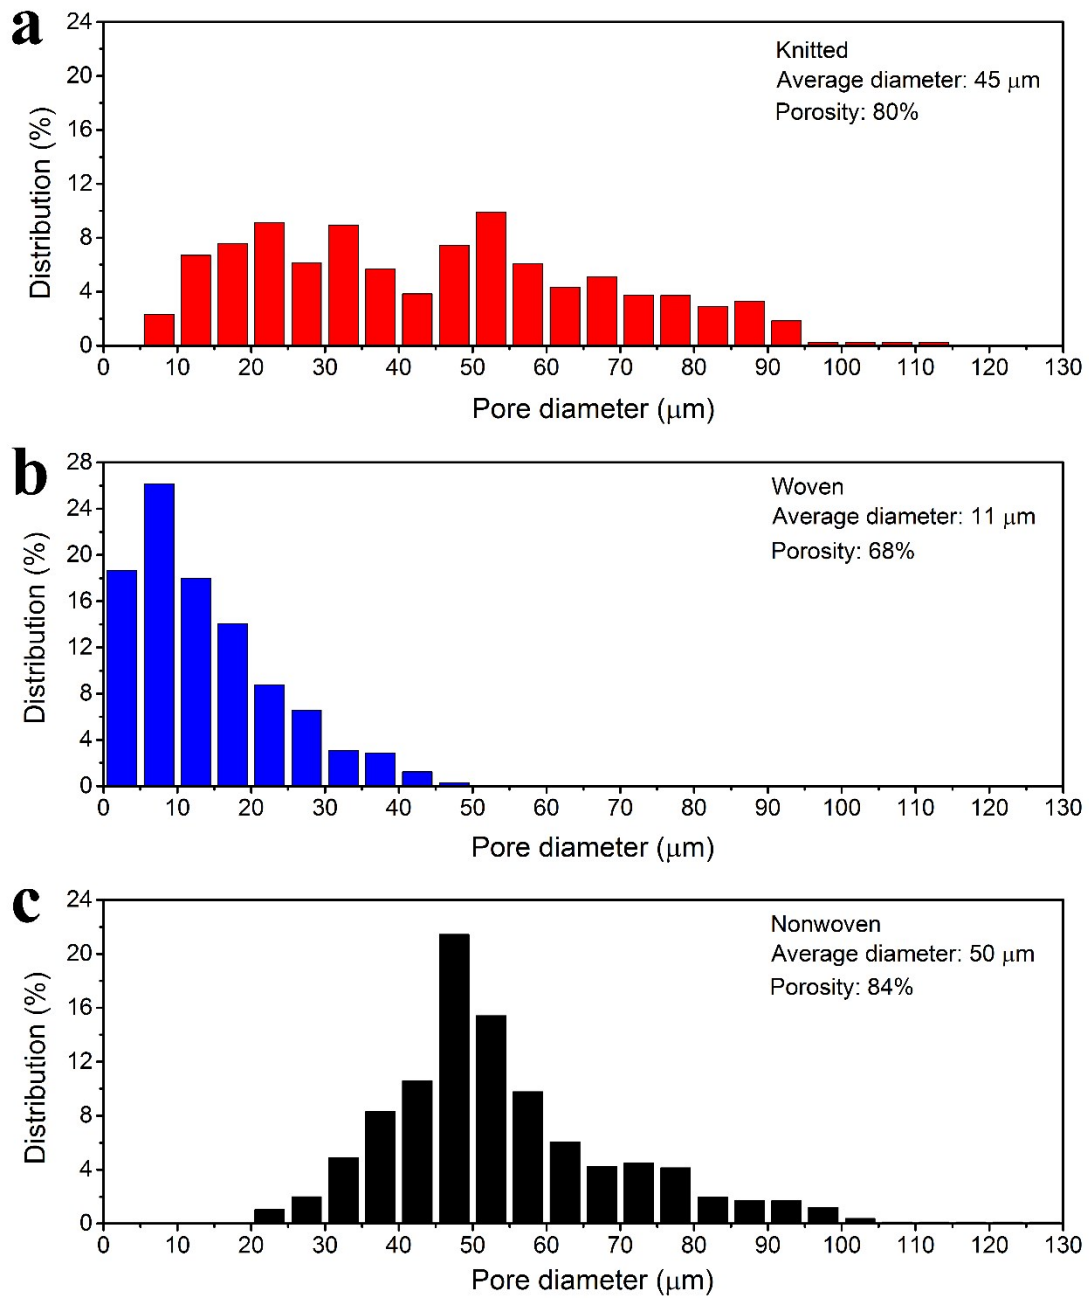

**Figure S3.** The porosities and pore size distributions of knitted, woven and nonwoven bare fabrics.

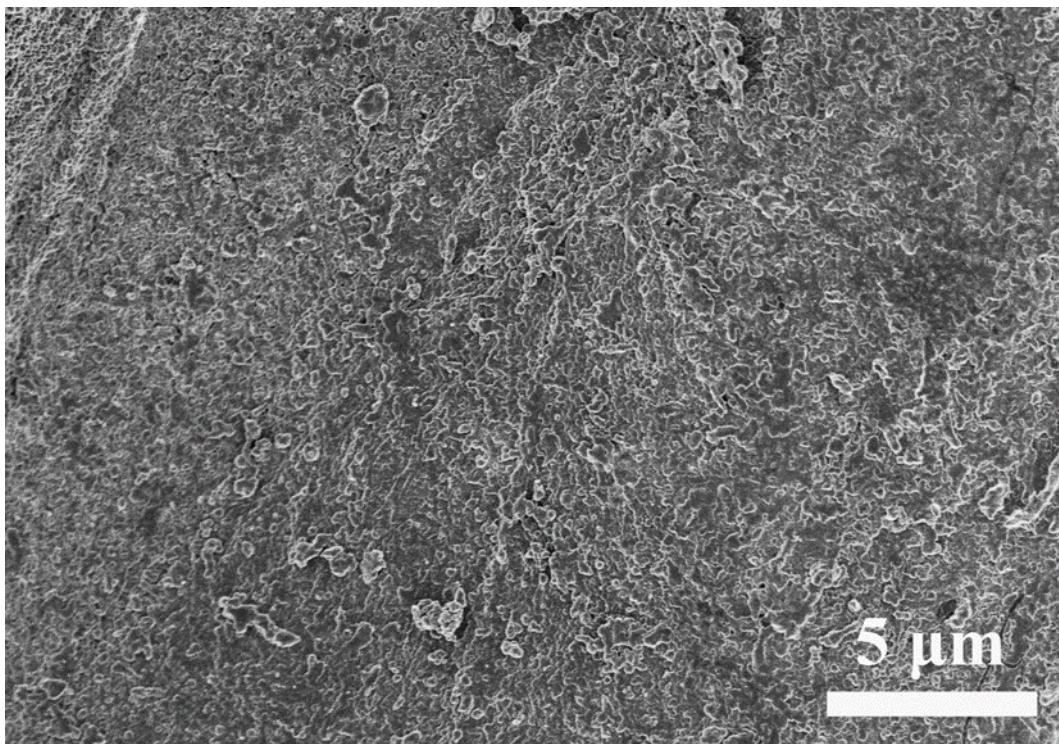

**Figure S4.** A high-magnification SEM image of PPy-coated cellulose fiber in PPy-coated knitted fabric with a PPy mass loading of  $12.3 \text{ mg cm}^{-2}$ .

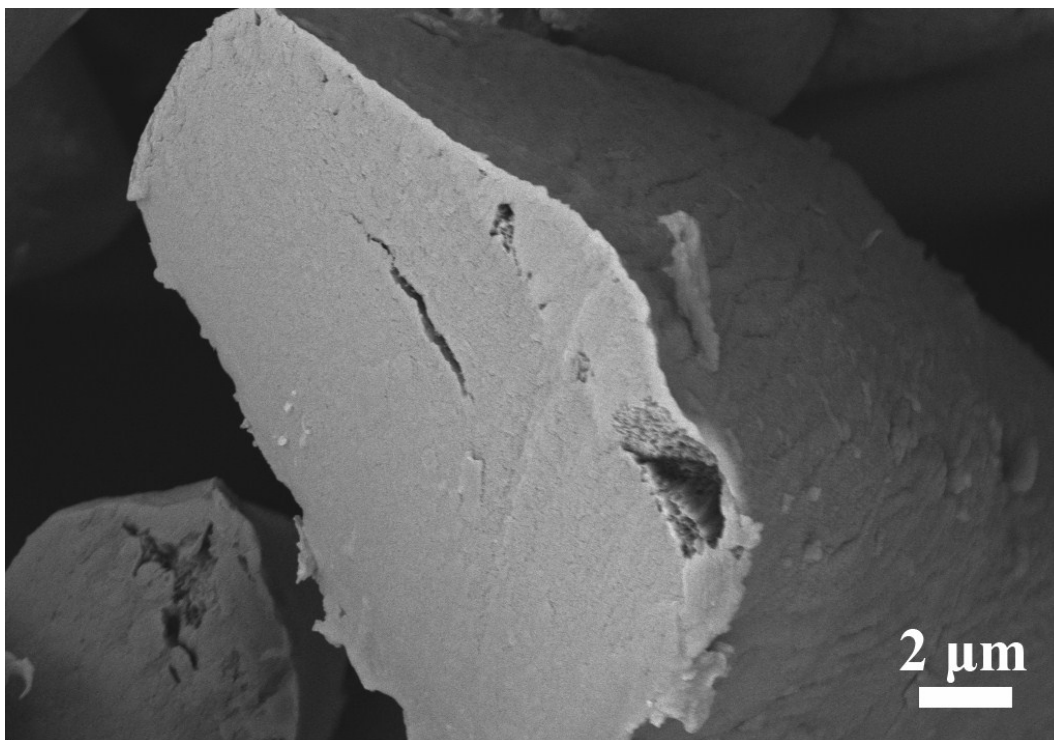

**Figure S5.** A cross-sectional SEM image of PPy-coated cellulose fiber in PPy-coated knitted fabric with a PPy mass loading of  $12.3 \text{ mg cm}^{-2}$ .



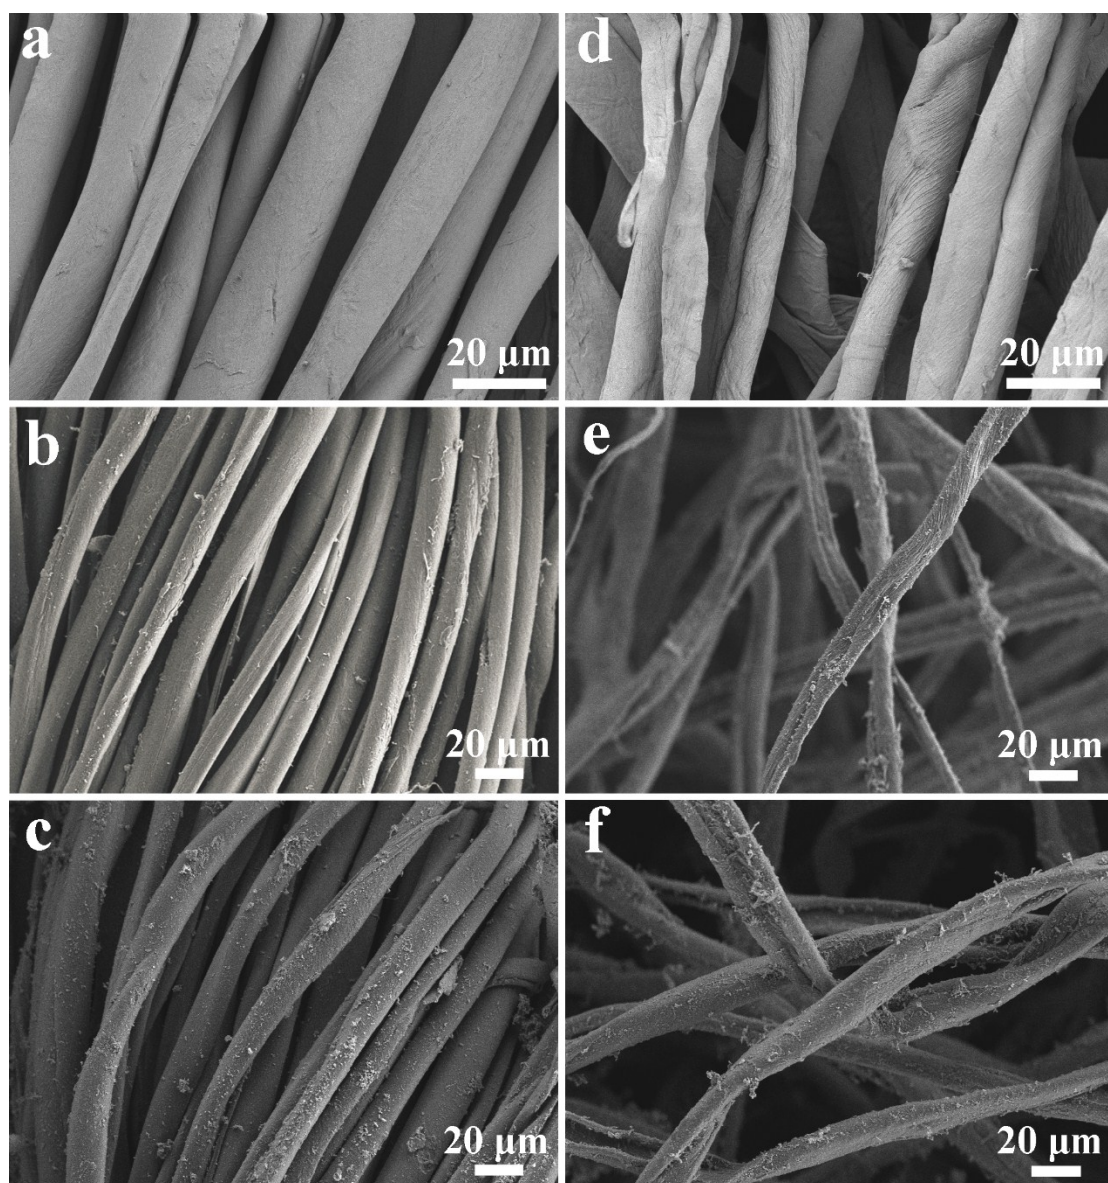

**Figure S6.** (a-c) Woven fabrics with the PPy mass loadings of 0, 2.58 and 5.88 mg cm<sup>-2</sup>, respectively. (d-f) Nonwoven fabrics with the PPy mass loadings of 0, 3.03 and 7.17 mg cm<sup>-2</sup>, respectively.

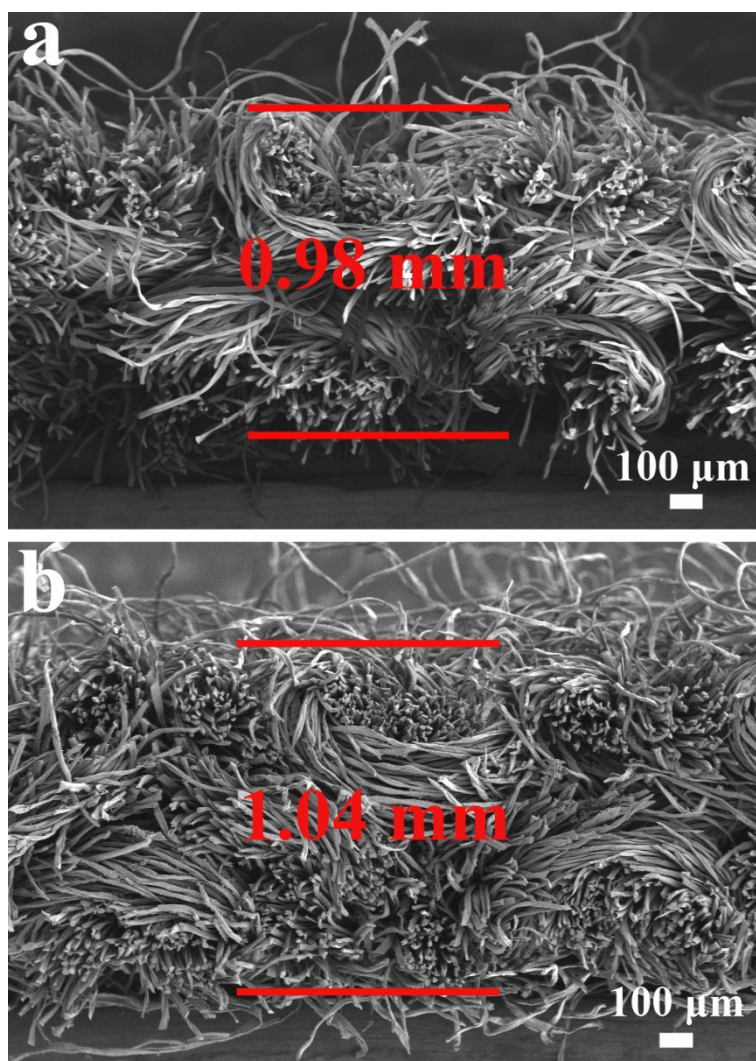

**Figure S7.** Cross-sectional SEM images of (a) bare knitted fabric and (b) PPy-coated knitted fabric with a mass loading of  $12.3 \text{ mg cm}^{-2}$ .



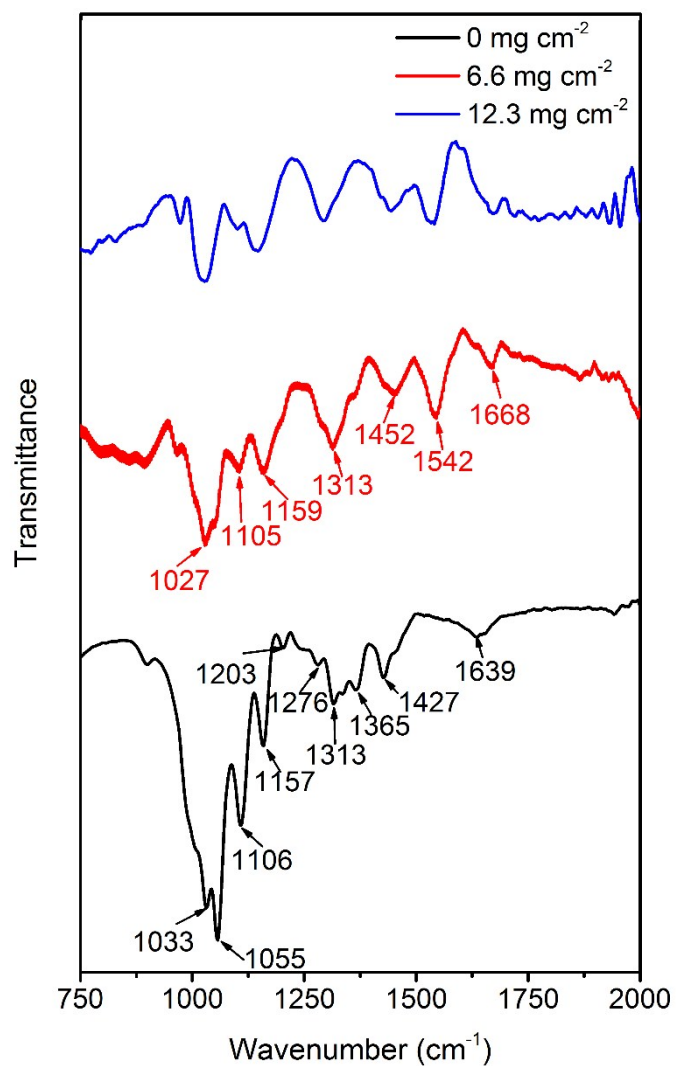

**Figure S8.** Fourier transform infrared (FTIR) spectroscopy characterization of bare and PPy-coated knitted fabrics.

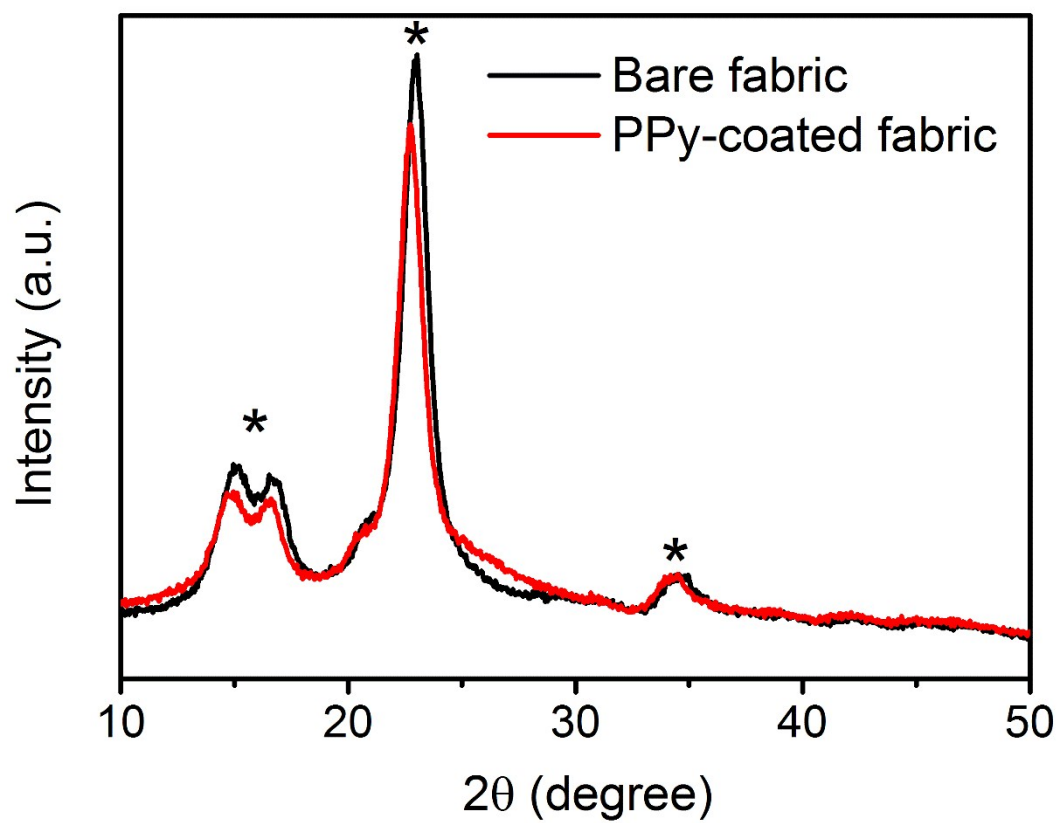

**Figure S9.** X-ray diffraction (XRD) spectrum of bare and PPy-coated fabrics.

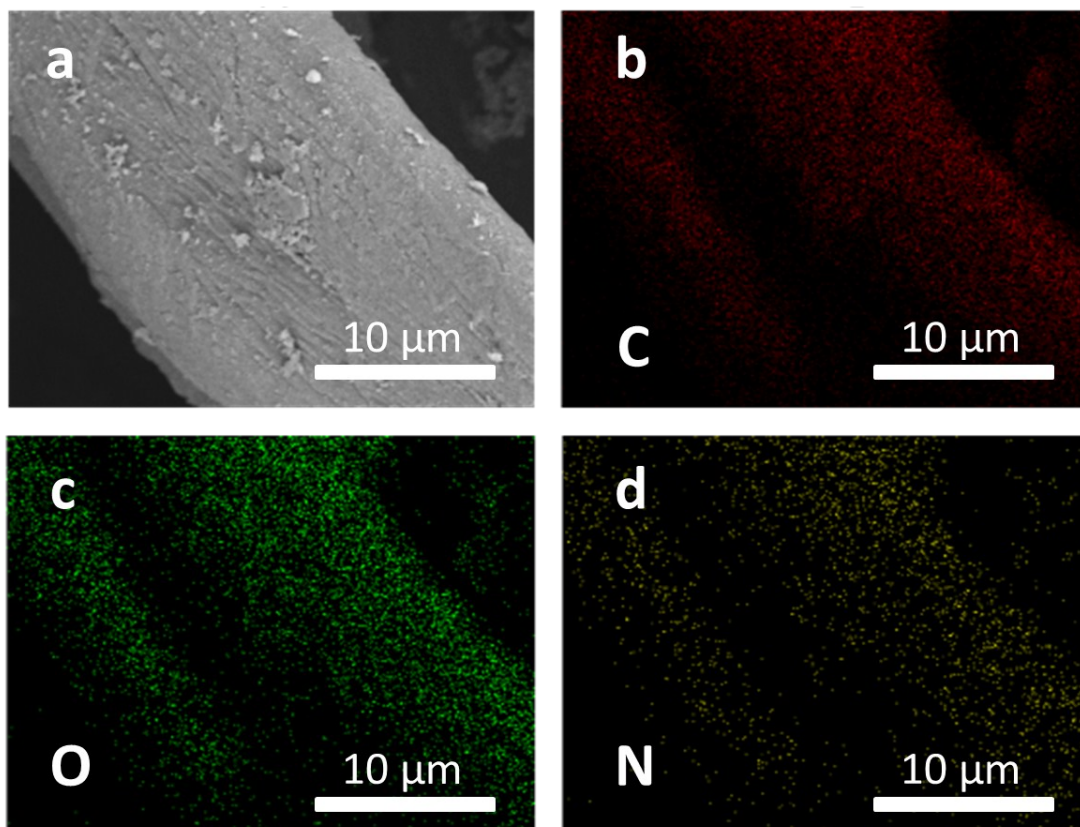

**Figure S10.** Energy dispersive spectroscopy (EDS) characterization of PPy-coated fiber in PPy-coated knitted fabric with a mass loading of  $12.3 \text{ mg cm}^{-2}$ . (a) SEM image. The mapping images of (b) C, (c) O and (d) N.

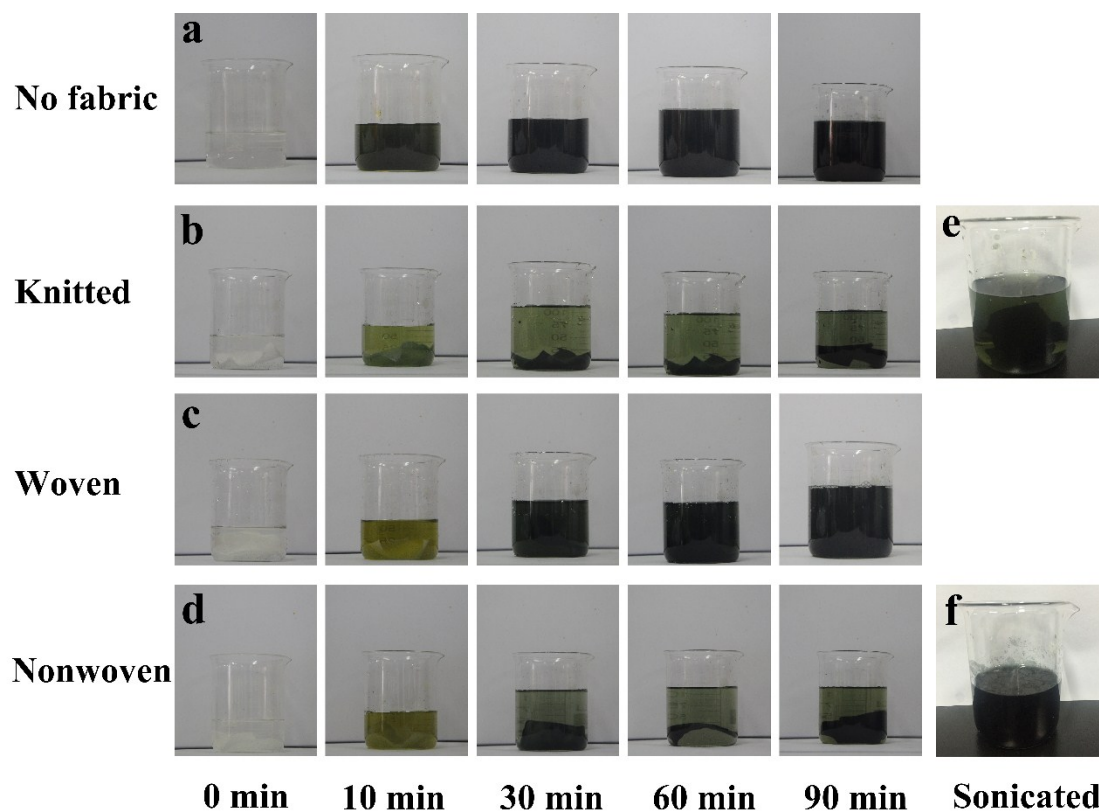

**Figure S11.** Photographs of the polymerization process of pyrrole solutions (a) without fabric, (b) with a knitted fabric, (c) with a woven fabric and (d) with a nonwoven fabric. (e) Pyrrole solution with a knitted fabric undergoing 90 min polymerization after ultrasonic treatment for 5 min. (f) Pyrrole solution with a nonwoven fabric undergoing 90 min polymerization after ultrasonic treatment for 5 min. The pyrrole concentrations for all solutions are the same of  $0.2 \text{ mol L}^{-1}$ .

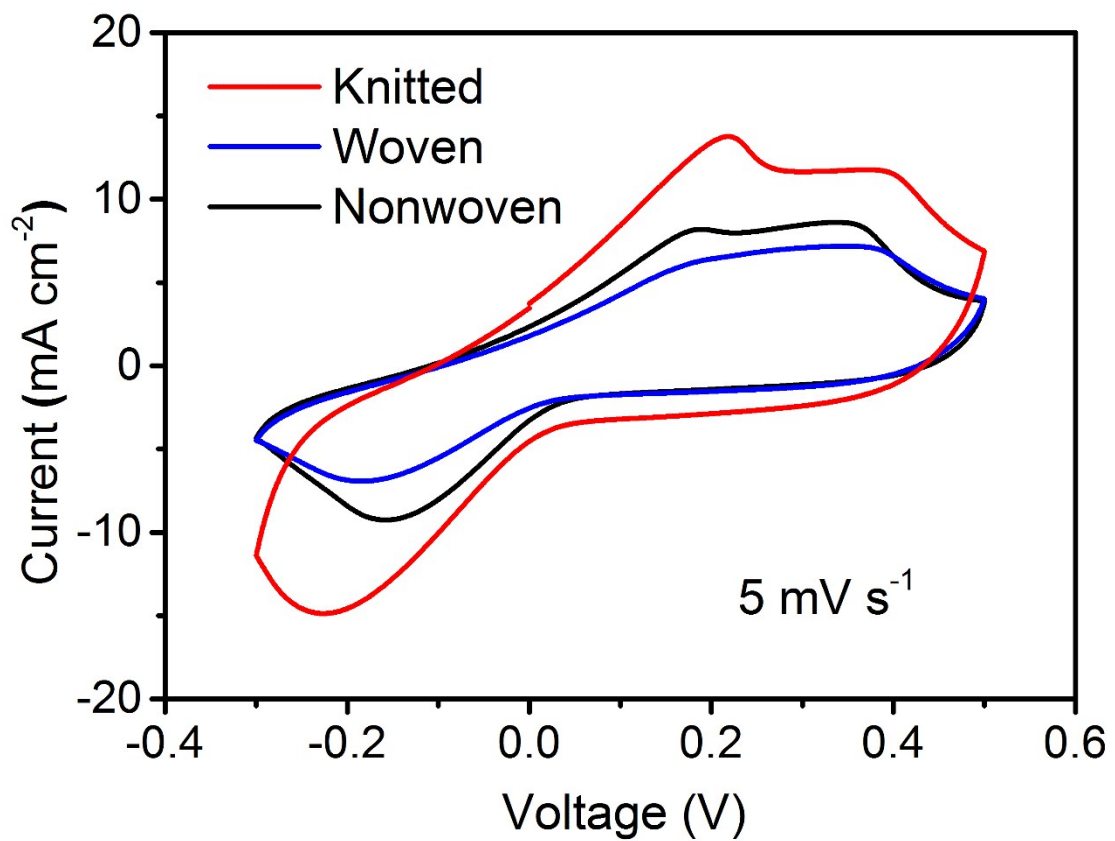

**Figure S12.** Cyclic voltammograms for PPy-coated knitted, woven and nonwoven fabrics. They were prepared from the same pyrrole concentration of 0.20 mol L<sup>-1</sup>.



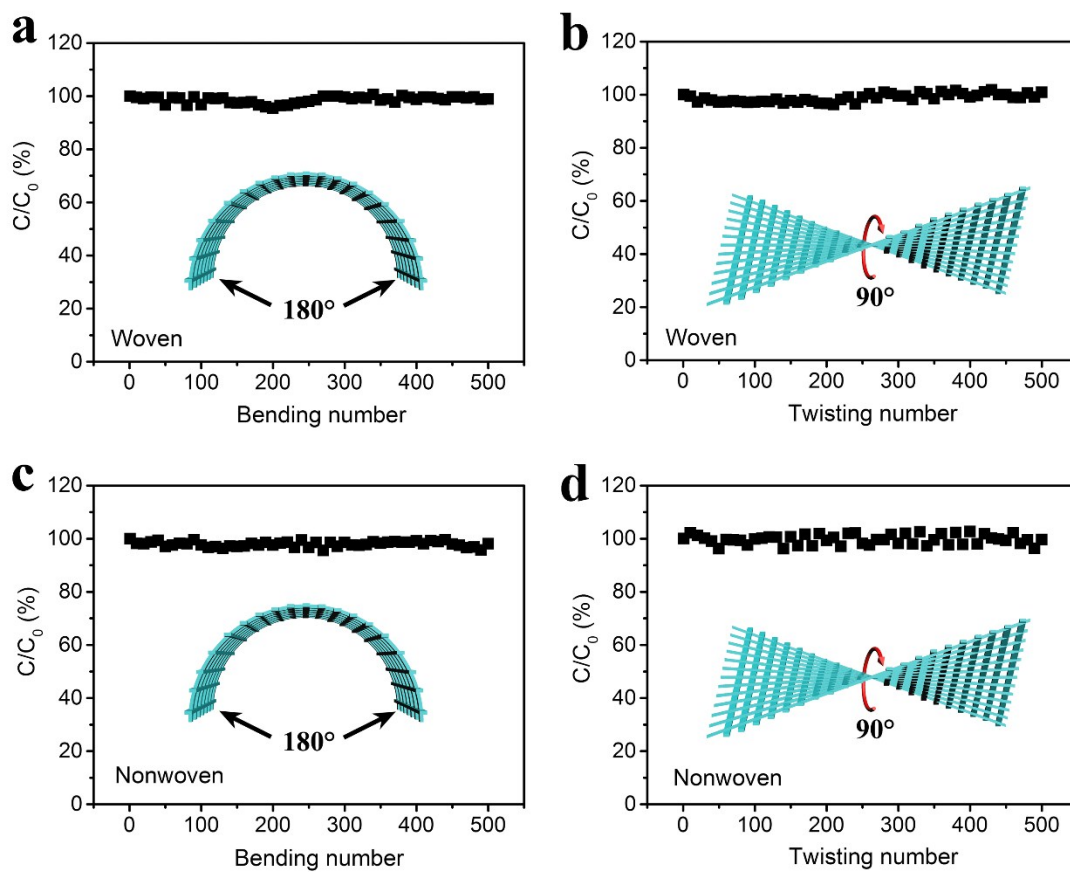

**Figure S13.** Flexibility of the supercapacitor assembled from the same two PPy-coated woven fabrics under (a) bending and (b) twisting. The PPy mass loading was  $5.88 \text{ mg cm}^{-2}$ . Flexibility of the supercapacitor assembled from the same two PPy-coated nonwoven fabrics under (c) bending and (d) twisting. The PPy mass loading was  $7.17 \text{ mg cm}^{-2}$ .

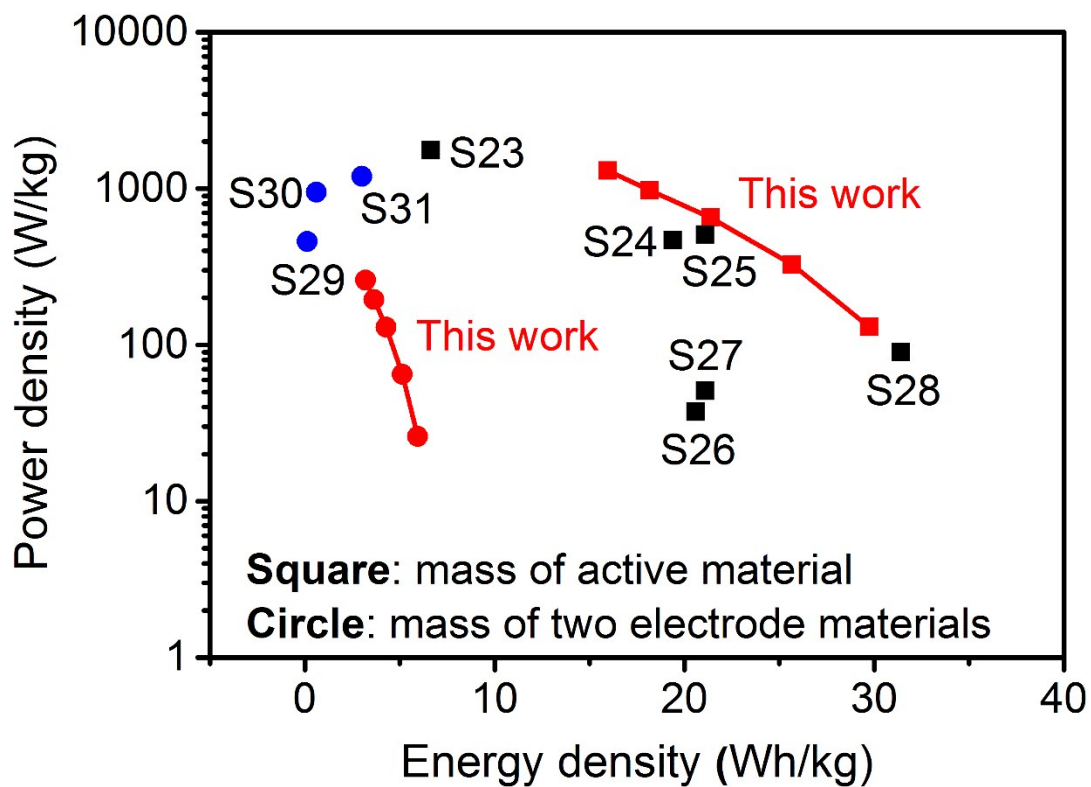

**Figure S14.** Ragone plot of the proposed supercapacitor compared with previous supercapacitors using fabrics as the template.

## References for the Supporting Information

- S1. J. Xu, D. Wang, Y. Yuan, W. Wei, L. Duan, L. Wang, H. Bao and W. Xu, *Org. Electron.*, 2015, **24**, 153.
- S2. Z. Wang, P. Tammela, M. Stromme and L. Nyholm, *Nanoscale*, 2015, **7**, 3418.
- S3. L. Yuan, B. Yao, B. Hu, K. Huo, W. Chen and J. Zhou, *Energy Environ. Sci.*, 2013, **6**, 470.
- S4. J. Cao, Y. Wang, J. Chen, X. Li, F. C. Walsh, J.-H. Ouyang, D. Jia and Y. Zhou, *J. Mater. Chem. A*, 2015, **3**, 14445.
- S5. B. Yue, C. Wang, X. Ding and G. G. Wallace, *Electrochim. Acta*, 2013, **113**, 17.
- S6. J. Xu, D. Wang, L. Fan, Y. Yuan, W. Wei, R. Liu, S. Gu and W. Xu, *Org. Electron.*, 2015, **26**, 292.
- S7. Y.-Y. Horng, Y.-C. Lu, Y.-K. Hsu, C.-C. Chen, L.-C. Chen and K.-H. Chen, *J. Power Sources*, 2010, **195**, 4418.
- S8. K. Wang, P. Zhao, X. Zhou, H. Wu and Z. Wei, *J. Mater. Chem.*, 2011, **21**, 16373.
- S9. Q. Cheng, J. Tang, J. Ma, H. Zhang, N. Shinya and L.-C. Qin, *J. Phys. Chem. C*, 2011, **115**, 23584.
- S10. S. Y. Liew, W. Thielemans and D. A. Walsh, *J. Solid State Electrochem.*, 2014, **18**, 3307.
- S11. L. Yuan, X. Xiao, T. Ding, J. Zhong, X. Zhang, Y. Shen, B. Hu, Y. Huang, J. Zhou and Z. L. Wang, *Angew. Chem. Int. Ed.*, 2012, **51**, 4934.
- S12. S. B. Kulkarni, U. M. Patil, I. Shackery, J. S. Sohn, S. Lee, B. Park and S. Jun, *J. Mater. Chem. A*, 2014, **2**, 4989.
- S13. G. Otkrokhov, D. Pankratov, G. Shumakovich, M. Khlupova, Y. Zeifman, I. Vasil'eva, O. Morozova and A. Yaropolov, *Electrochim. Acta*, 2014, **123**, 151.
- S14. M. Yu, Y. Ma, J. Liu and S. Li, *Carbon*, 2015, **87**, 98.
- S15. C. Tran, R. Singhal, D. Lawrence and V. Kalra, *J. Power Sources*, 2015, **293**, 373.
- S16. A. Laforgue, *J. Power Sources*, 2011, **196**, 559.
- S17. G. P. Pandey, A. C. Rastogi and C. R. Westgate, *J. Power Sources*, 2014, **245**, 857.
- S18. Y.-C. Chen, Y.-K. Hsu, Y.-G. Lin, Y.-K. Lin, Y.-Y. Horng, L.-C. Chen and K.-H. Chen, *Electrochim. Acta*, 2011, **56**, 7124.

- S19. G. Yu, L. Hu, M. Vosgueritchian, H. Wang, X. Xie, J. R. McDonough, X. Cui, Y. Cui and Z. Bao, *Nano Lett*, 2011, **11**, 2905.
- S20. L. Hu, W. Chen, X. Xie, N. Liu, Y. Yang, H. Wu, Y. Yao, M. Pasta, H. N. Alshareef and Y. Cui, *ACS Nano*, 2011, **5**, 8904.
- S21. L. Yuan, X.-H. Lu, X. Xiao, T. Zhai, J. Dai, F. Zhang, B. Hu, X. Wang, L. Gong, J. Chen, C. Hu, Y. Tong, J. Zhou and Z. L. Wang, *ACS Nano*, 2012, **6**, 656.
- S22. M. Yu, T. Zhai, X. Lu, X. Chen, S. Xie, W. Li, C. Liang, W. Zhao, L. Zhang and Y. Tong, *J. Power Sources*, 2013, **239**, 64.
- S23. K. Wang, P. Zhao, X. Zhou, H. Wu and Z. Wei, *J. Mater. Chem.*, 2011, **21**, 16373.
- S24. J. Xu, D. Wang, L. Fan, Y. Yuan, W. Wei, R. Liu, S. Gu and W. Xu, *Org. Electron.*, 2015, **26**, 292.
- S25. X. Bai, X. Hu and S. Zhou, *RSC Adv.*, 2015, **5**, 43941.
- S26. L. Zhu, L. Wu, Y. Sun, M. Li, J. Xu, Z. Bai, G. Liang, L. Liu, D. Fang and W. Xu, *RSC Adv.*, 2013, **4**, 6261.
- S27. J. Xu, D. Wang, Y. Yuan, W. Wei, L. Duan, L. Wang, H. Bao and W. Xu, *Org. Electron.*, 2015, **24**, 153.
- S28. P. Tang, L. Han and L. Zhang, *ACS Appl. Mater. Inter.*, 2014, **6**, 10506.
- S29. Y. J. Kang, H. Chung, C. H. Han and W. Kim, *Nanotechnology*, 2012, **23**, 123.
- S30. A. Razaq, L. Nyholm, M. Sjödin, M. Strømme and A. Mihranyan, *Adv. Energy Mater.*, 2012, **2**, 445.
- S31. Z. Wang, P. Tammela, P. Zhang, M. Strømme and L. Nyholm, *J. Mater. Chem. A*, 2014, **2**, 7711.
